# Supplementary material
Source: MDPI journal article supplement (https://www.mdpi.com/2673-7655/4/1/2)
Supplement: s1 [file s1]

# Lodging Variability in Sorghum Stalks Is Dependent on the Biomechanical and Chemical Composition of the Stalk Rinds

Endalkachew Mengistie <sup>1</sup>, Norbert Bokros <sup>2</sup>, Seth DeBolt <sup>2</sup> and Armando G. McDonald <sup>1,\*</sup>

<sup>1</sup> Forest and Sustainable Products Program, College of Natural Resources, University of Idaho, Moscow, ID 83844, USA

<sup>2</sup> Plant Physiology, Department of Horticulture, Agricultural Science Center North, University of Kentucky, Lexington, KY 40546, USA

\* Correspondence: armandm@uidaho.edu; Tel.: +1-208-885-9454

## Supplementary Material

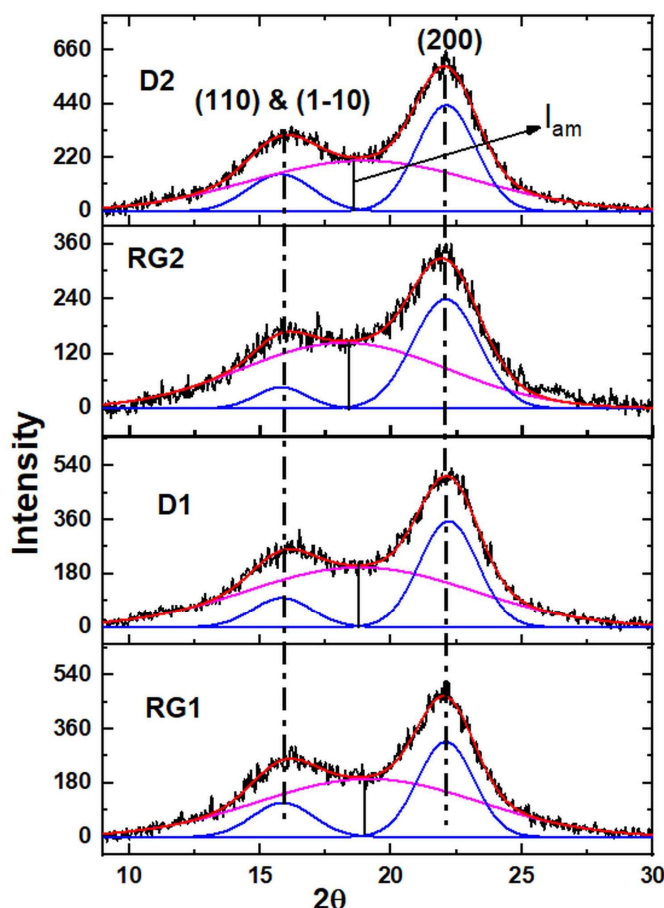

**Figure S1.** XRD diffractograms of powdered sorghum rinds from D2, RG2, D1 and RG1. The diffraction was performed on the powder samples of rinds. The diffractogram shown was obtained after subtracting the baseline and deconvolution of the amorphous and crystalline regions using Gaussian curve-fitting. The peaks (110) and (1-10) were not detected as separate peaks.

**Citation:** Mengistie, E.; Bokros, N.; DeBolt, S.; McDonald, A.G. Lodging Variability in Sorghum Stalks Is Dependent on the Biomechanical and Chemical Composition of the Stalk Rinds. *Crops* **2024**, *4*, Firstpage–Lastpage.  
<https://doi.org/10.3390/xxxxx>

Received: 25 October 2023

Revised: 26 December 2023

Accepted: 5 January 2024

Published: 11 January 2024

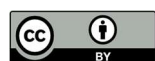

**Copyright:** © 2024 by the authors. Submitted for possible open access publication under the terms and conditions of the Creative Commons Attribution (CC BY) license (<https://creativecommons.org/licenses/by/4.0/>).

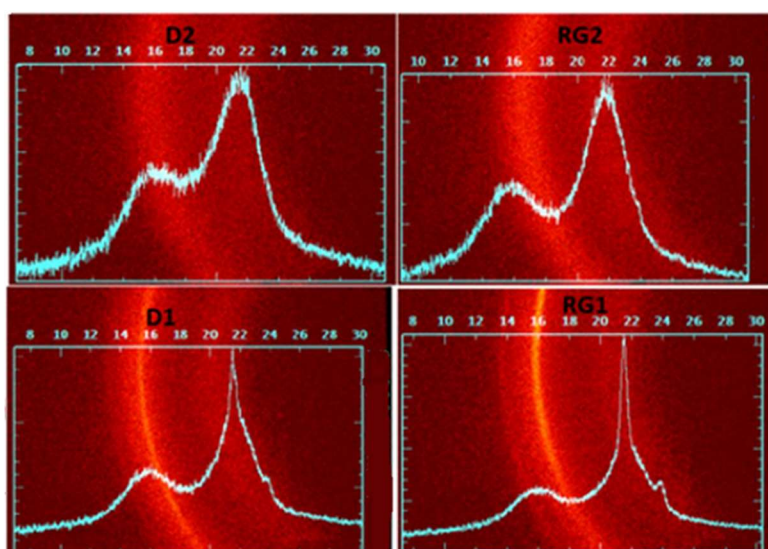

**Figure S2.** X-ray diffraction patterns of intact D2, RG2, D1 and RG1 rinds.

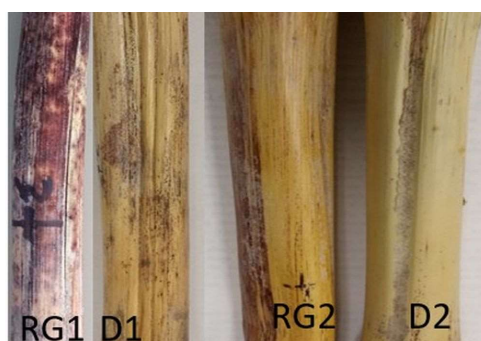

**Figure S3.** Representative samples for RG1, D1, RG2 and D2 stalks at Internode 2.

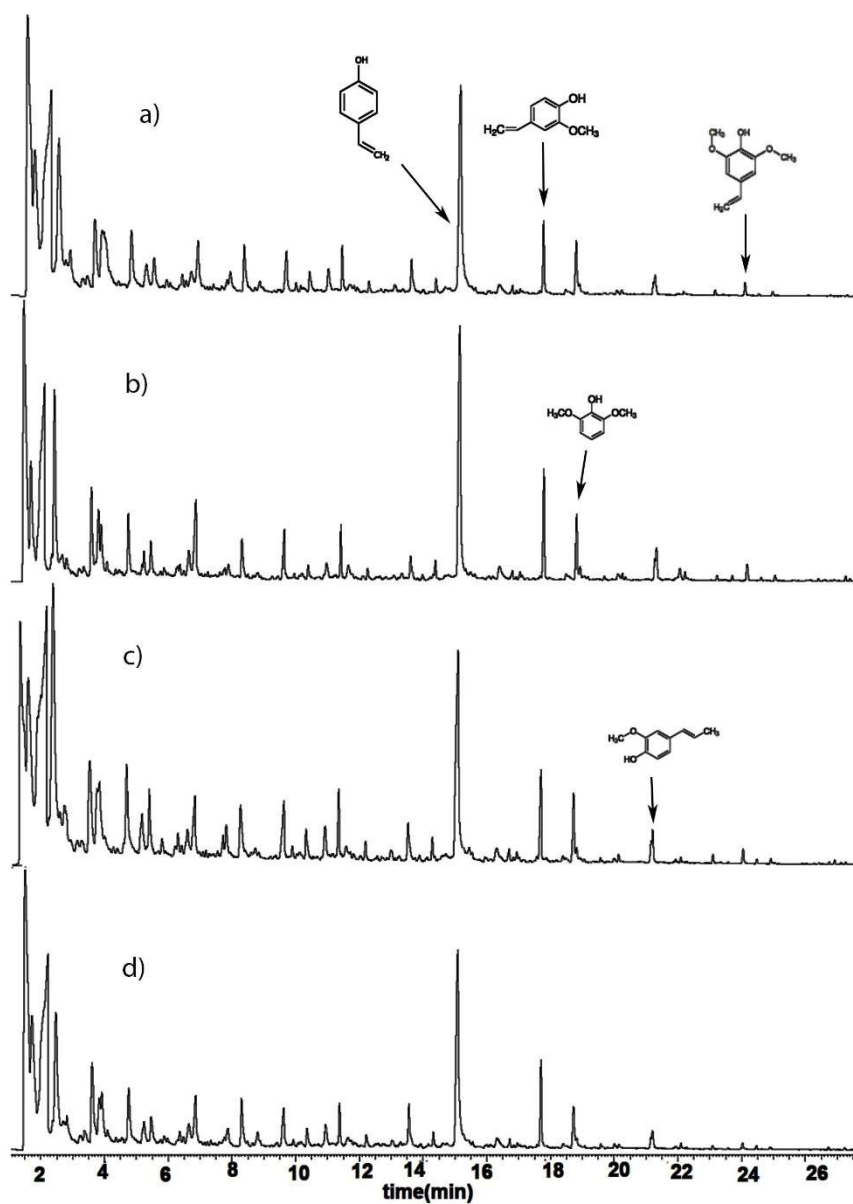

**Figure S4.** Py-GCMS pyrograms of rinds from a) D2, b) RG2, c) D1 and d) RG1.

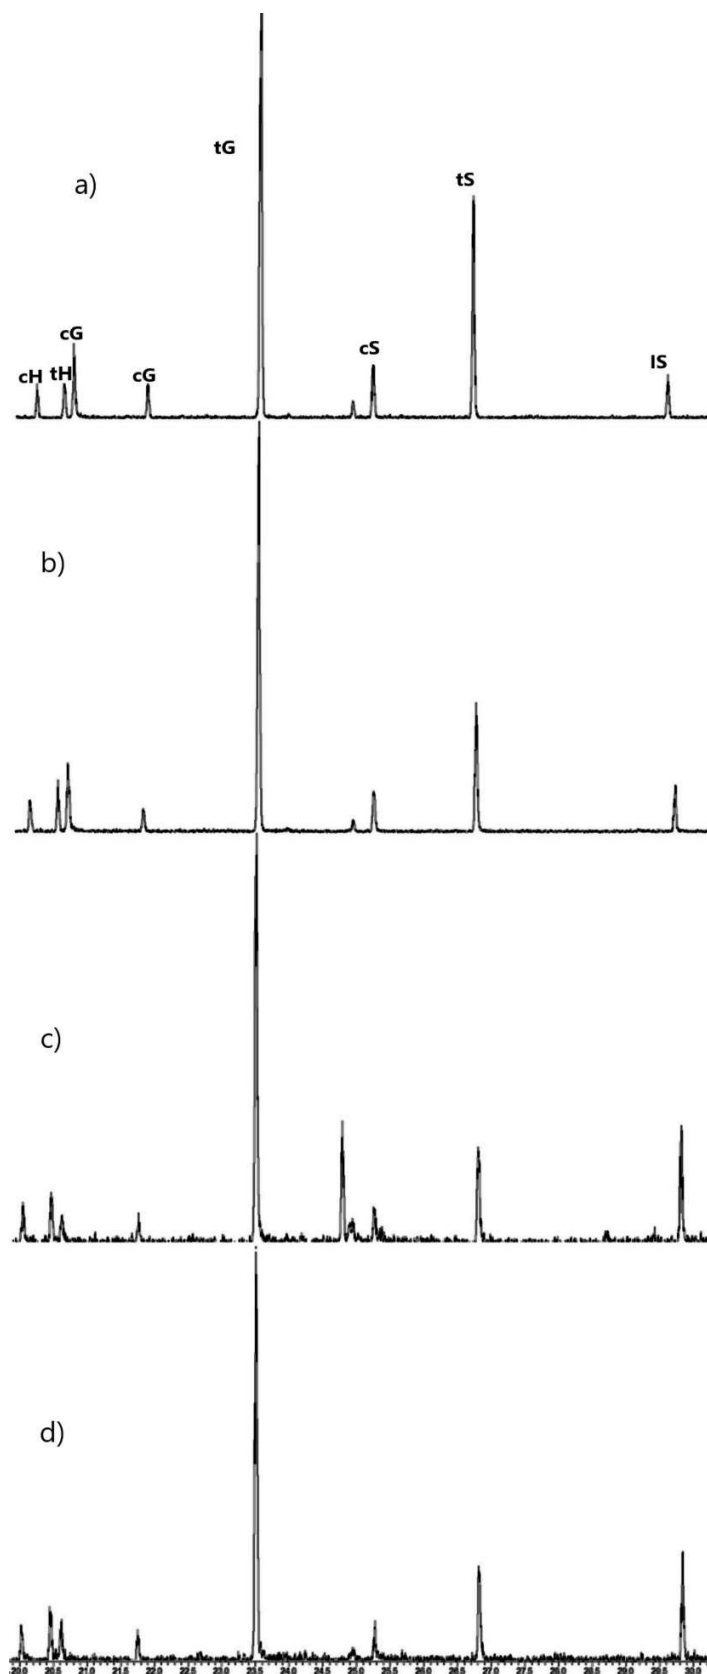

**Figure S5.** Chromatograms (GC-TIC) of the DFRC degradation products from the MWL isolated from sorghum stalks of: (a) D2, b) RG2, c) D1 and d) RG1. The monomers cH, tH, cG, tG, cS, represents cis- and trans- *p*-hydroxyphenyl, guaiacyl and syringyl.

**Table S1.** FTIR Assignments for functional groups in sorghum rinds of WT1, RG1, WT2 and RG2 assigned based on [71,93].

| Wavenumber<br>(cm <sup>-1</sup> ) | Assignments                                                                                                                                                                |
|-----------------------------------|----------------------------------------------------------------------------------------------------------------------------------------------------------------------------|
| 3340                              | O–H stretching from cellulose, hemicellulose, and lignin (phenolic and CH <sub>2</sub> OH)                                                                                 |
| 2900;2853                         | Asymmetric and symmetric C–H stretching respectively; from OCH <sub>3</sub> & CH <sub>3</sub> and CH <sub>2</sub> groups of the side chains of lignin and aliphatic waxes. |
| 1730                              | Unconjugated C=O stretching in ketones, aldehydes, and ester groups.                                                                                                       |
| 1630                              | Conjugated carbonyl-carboxyl stretching from ketone groups                                                                                                                 |
| 1605-1600                         | C=C vibrations in S and G lignin, coupled with C=O stretch                                                                                                                 |
| 1520-1510                         | Aromatic skeletal (C=C) vibrations of S and G                                                                                                                              |
| 1460                              | Asymmetric bending of C–H from CH <sub>2</sub> in cellulose, CH <sub>3</sub> in CH <sub>3</sub> O and hemicelluloses (CH <sub>3</sub> -(C=O)-)                             |
| 1425-1430                         | Skeletal vibrations (C=C) coupled with C–H in plane deformation                                                                                                            |
| 1375                              | C–H bending of CH <sub>3</sub> in cellulose and hemicelluloses                                                                                                             |
| 1325                              | Syringyl ring breathing with C–O stretching                                                                                                                                |
| 1235                              | C–C, C–O and C=O stretching in Guacyl                                                                                                                                      |
| 1160                              | Typical for HGS; C=O stretching from conjugated ketone and ester groups                                                                                                    |
| 1120                              | Aromatic C–H bending in-plane (typical for S units)                                                                                                                        |
| 1035                              | Mainly C–O–C glycosidic linkage from hemicellulose and cellulose                                                                                                           |
| 898                               | C–H deformation in cellulose                                                                                                                                               |
| 865                               | Aromatic out-of-plane deformation vibration in G                                                                                                                           |
| 835                               | C-H out-of-plane in position 2 and 6 of S, and in all positions of H units                                                                                                 |
| 820                               | Aromatic out-of-plane deformation vibration in S                                                                                                                           |

**Table S2.** Pyrolysis products identified in the rinds of D2, RG2, D1 and RG1 sorghum variety.

| RT   | Compound                                    | MW  | Formula                                        | D2         | RG2        | D1         | RG1        |
|------|---------------------------------------------|-----|------------------------------------------------|------------|------------|------------|------------|
| 1.43 | Carbon dioxide                              | 44  | CO <sub>2</sub>                                | 19.29±1.61 | 14.90±0.78 | 12.86±1.50 | 17.42±0.97 |
| 1.72 | Methyl glyoxal                              | 72  | C <sub>3</sub> H <sub>4</sub> O <sub>2</sub>   | 8.04±0.24  | 6.53±0.15  | 9.28±0.345 | 7.55±0.60  |
| 2.24 | Acetic acid                                 | 60  | C <sub>2</sub> H <sub>4</sub> O <sub>2</sub>   | 15.23±1.13 | 13.49±1.01 | 12.21±0.52 | 15.67±0.56 |
| 2.49 | 1-hydroxy-2-Propanone                       | 74  | C <sub>3</sub> H <sub>6</sub> O <sub>2</sub>   | 7.54±0.07  | 6.96±0.04  | 9.96±0.62  | 7.33±0.28  |
| 2.84 | Dianhydromannitol                           | 146 | C <sub>6</sub> H <sub>10</sub> O <sub>4</sub>  | 1.29±0.04  | 0.88±0.11  | 1.01±0.11  | 0.75±0.19  |
| 3.21 | Butanal, 3-hydroxy-                         | 88  | C <sub>4</sub> H <sub>8</sub> O <sub>2</sub>   | 0.44±0.04  | 0.34±0.01  | 0.4±0.04   | 0.39±0.01  |
| 3.36 | 3-Cyclopentene-1,2-diol, cis-               | 100 | C <sub>5</sub> H <sub>8</sub> O <sub>2</sub>   | 0.48±0.01  | 0.42±0.01  | 0.45±0.01  | 0.73±0.02  |
| 3.61 | 2-Butanone, 1-(acetyloxy)-                  | 130 | C <sub>6</sub> H <sub>10</sub> O <sub>3</sub>  | 2.39±0.26  | 2.93±0.06  | 3.07±0.18  | 2.89±0.03  |
| 3.84 | Succindialdehyde                            | 86  | C <sub>4</sub> H <sub>6</sub> O <sub>2</sub>   | 4.21±0.04  | 4.18±0.07  | 3.88±0.4   | 4.18±0.06  |
| 4.76 | Furfural                                    | 96  | C <sub>5</sub> H <sub>4</sub> O <sub>2</sub>   | 2.54±0.01  | 2.45±0.04  | 2.43±0.41  | 2.55±0.01  |
| 5.23 | 2-Furanmethanol                             | 98  | C <sub>5</sub> H <sub>6</sub> O <sub>2</sub>   | 1.11±0.02  | 1.02±0.02  | 1.35±0.02  | 1.02±0.01  |
| 5.44 | 2-Propanone, 1-(acetyloxy)-                 | 116 | C <sub>5</sub> H <sub>8</sub> O <sub>3</sub>   | 1.33±0.07  | 1.23±0.02  | 1.64±0.04  | 1.34±0.01  |
| 5.83 | Cyclohexanone, 3-hydroxy-                   | 114 | C <sub>6</sub> H <sub>10</sub> O <sub>2</sub>  | 0.26±0.01  | 0.38±0.01  | 0.44±0.06  | 0.26±0.03  |
| 6.32 | 2-Cyclopenten-1-one, 2-methyl-              | 96  | C <sub>6</sub> H <sub>8</sub> O                | 0.56±0.01  | 0.68±0.01  | 0.54±0.06  | 0.72±0.08  |
| 6.47 | Ethanone, 1-(2-furanyl)-                    | 110 | C <sub>6</sub> H <sub>8</sub> O <sub>2</sub>   | 0.15±0.01  | 0.14±0.00  | 0.14±0.03  | 0.21±0.00  |
| 6.63 | Dihdropyran                                 | 84  | C <sub>5</sub> H <sub>8</sub> O                | 0.91±0.04  | 1.11±0.00  | 0.92±0.07  | 1.00±0.04  |
| 6.86 | 1,2-Cyclopentanedione                       | 98  | C <sub>5</sub> H <sub>6</sub> O <sub>2</sub>   | 2.14±0.11  | 2.66±0.01  | 1.86±0.09  | 2.43±0.06  |
| 7.85 | 2-Furancarboxaldehyde, 5-methyl-            | 110 | C <sub>6</sub> H <sub>8</sub> O <sub>2</sub>   | 0.94±0.07  | 0.67±0.01  | 0.91±0.04  | 0.71±0.04  |
| 8.26 | Phenol                                      | 94  | C <sub>6</sub> H <sub>6</sub> O                | 1.79±0.01  | 1.67±0.01  | 1.75±0.01  | 1.98±0.08  |
| 8.79 | 3,4-Dihydro-2-methoxy-2H-pyran              | 114 | C <sub>6</sub> H <sub>10</sub> O <sub>2</sub>  | 0.41±0.10  | 0.40±0.01  | 0.28±0.00  | 0.36±0.00  |
| 9.57 | 3-Methyl-1,2-cyclopentanedione              | 112 | C <sub>6</sub> H <sub>8</sub> O <sub>2</sub>   | 1.69±0.19  | 1.66±0.01  | 1.7±0.01   | 1.85±0.13  |
| 9.89 | 2,3-Dimethyl-2-cyclopenten-1-one            | 110 | C <sub>7</sub> H <sub>10</sub> O               | 0.30±0.02  | 0.25±0.01  | 0.27±0.05  | 0.24±0.00  |
| 10.4 | Phenol, 3-methyl-                           | 108 | C <sub>7</sub> H <sub>8</sub> O                | 0.75±0.01  | 0.62±0.02  | 0.76±0.02  | 0.69±0.04  |
| 10.9 | Phenol, 3-methyl-                           | 108 | C <sub>7</sub> H <sub>8</sub> O                | 1.00±0.04  | 0.89±0.09  | 1.089±0.04 | 1.05±0.05  |
| 11.4 | Phenol, 2-methoxy-                          | 124 | C <sub>7</sub> H <sub>8</sub> O <sub>2</sub>   | 1.04±0.01  | 1.28±0.04  | 1.18±0.03  | 1.20±0.02  |
| 11.7 | Cyclopropyl carbinol                        | 72  | C <sub>4</sub> H <sub>8</sub> O                | 0.14±0.00  | 0.825±0.02 | 0.22±0.11  | 0.61±0.04  |
| 12.2 | 2-Cyclopenten-1-one, 3-ethyl-2-hydroxy-     | 126 | C <sub>7</sub> H <sub>10</sub> O <sub>2</sub>  | 0.32±0.02  | 0.32±0.01  | 0.36±0.00  | 0.47±0.04  |
| 13.0 | Phenol, 2,5-dimethyl-                       | 122 | C <sub>8</sub> H <sub>10</sub> O               | 0.31±0.03  | 0.29±0.00  | 0.33±0.03  | 0.31±0.00  |
| 13.5 | Phenol, 4-ethyl-                            | 122 | C <sub>8</sub> H <sub>10</sub> O               | 1.27±0.1   | 1.65±0.35  | 1.47±0.25  | 1.35±0.07  |
| 14.3 | Creosol                                     | 138 | C <sub>8</sub> H <sub>10</sub> O <sub>2</sub>  | 0.43±0.06  | 0.68±0.06  | 0.49±0.01  | 0.52±0.04  |
| 15.0 | 4-vinylphenol                               | 120 | C <sub>8</sub> H <sub>8</sub> O                | 9.74±0.1   | 10.73±0.06 | 8.08±0.62  | 11.50±0.04 |
| 16.3 | 1,2-Benzenediol, 3-methoxy-                 | 140 | C <sub>7</sub> H <sub>8</sub> O <sub>3</sub>   | 0.85±0.02  | 0.74±0.04  | 1.45±0.27  | 2.95±0.98  |
| 16.7 | Phenol, 4-ethyl-2-methoxy-                  | 152 | C <sub>9</sub> H <sub>12</sub> O <sub>2</sub>  | 0.22±0.01  | 0.30±0.02  | 0.24±0.01  | 0.25±0.01  |
| 16.9 | p-Isobutylbenzaldehyde                      | 162 | C <sub>11</sub> H <sub>14</sub> O              | 0.26±0.04  | 0.31±0.00  | 0.26±0.00  | 0.26±0.03  |
| 17.7 | 2-Methoxy-4-vinylphenol                     | 150 | C <sub>9</sub> H <sub>10</sub> O <sub>2</sub>  | 1.82±0.00  | 2.70±0.16  | 1.90±0.05  | 2.57±0.04  |
| 18.7 | Phenol, 2,6-dimethoxy-                      | 154 | C <sub>8</sub> H <sub>10</sub> O <sub>3</sub>  | 1.82±0.05  | 2.23±0.05  | 1.68±0.08  | 2.12±0.11  |
| 20.0 | Benzaldehyde, 3-hydroxy-4-methoxy-          | 152 | C <sub>8</sub> H <sub>8</sub> O <sub>3</sub>   | 0.13±0.01  | 0.20±0.02  | 0.16±0.05  | 0.05±0.00  |
| 20.1 | Phenol, 4-methoxy-3-(methoxymethyl)-        | 168 | C <sub>9</sub> H <sub>12</sub> O <sub>3</sub>  | 0.20±0.06  | 0.21±0.00  | 0.88±0.04  | 0.16±0.00  |
| 21.2 | Phenol, 2-methoxy-4-(1-propenyl)-           | 164 | C <sub>10</sub> H <sub>12</sub> O <sub>2</sub> | 0.84±0.08  | 1.36±0.00  | 0.86±0.05  | 0.99±0.08  |
| 22.0 | Benzene, 3-ethyl-1,2,4,5-tetramethyl-       | 162 | C <sub>12</sub> H <sub>18</sub>                | 0.21±0.1   | 0.25±0.03  | 0.25±0.03  | 0.08±0.00  |
| 23.0 | 2,5-Dimethoxybenzoic acid                   | 182 | C <sub>9</sub> H <sub>10</sub> O <sub>4</sub>  | 0.19±0.02  | 0.21±0.01  | 0.16±0.00  | 0.08±0.00  |
| 24.0 | Phenol, 4-ethenyl-2,6-dimethoxy-            | 180 | C <sub>10</sub> H <sub>12</sub> O <sub>3</sub> | 0.60±0.07  | 0.53±0.03  | 0.61±0.10  | 0.20±0.11  |
| 24.8 | Phenol, 2,6-dimethoxy-4-(2-propenyl)-       | 194 | C <sub>11</sub> H <sub>14</sub> O <sub>3</sub> | 0.14±0.03  | 0.14±0.01  | 0.13±0.02  | 0.08±0.01  |
| 26.2 | Benzaldehyde, 4-hydroxy-3,5-dimethoxy-      | 182 | C <sub>9</sub> H <sub>10</sub> O <sub>4</sub>  | -          | 0.07±0.01  | -          | -          |
| 27.0 | (E)-2,6-Dimethoxy-4-(prop-1-en-1-yl) phenol | 194 | C <sub>11</sub> H <sub>14</sub> O <sub>3</sub> | -          | 0.27±0.16  | -          | -          |
| 27.8 | Benzaldehyde, 2,3,4-trimethoxy-             | 196 | C <sub>10</sub> H <sub>12</sub> O <sub>4</sub> | -          | 0.185±0.08 | -          | -          |

Note: RT=retention time (min); MW= Molecular weight, the errors are standard error from duplicates
